# Supplementary material for: A pH-stable Ag(i) multifunctional luminescent sensor for the efficient detection of organic solvents, organochlorine pesticides and heavy metal ions
Source: Royal Society of Chemistry journal article supplement (doi:10.1039/d0ra08991e), 2020-01-01
Supplement: d0ra08991e1.pdf [file d0ra08991e1.pdf]

## Supporting Information For

# A pH-stable Ag(I) multifunctional luminescent sensor for the efficient detection of organic solvents, organochlorine pesticides and heavy metal ions

Jianxin Ma,<sup>a</sup> Yue Wang,<sup>a</sup> Guocheng Liu,<sup>a</sup> Na Xu\*<sup>a</sup> and Xiuli Wang\*<sup>a</sup>

<sup>a</sup> College of Chemistry and Materials Engineering, Bohai University, Liaoning Professional Technology Innovation Center of Liaoning Province for Conversion Materials of Solar Cell, Jinzhou 121013, P. R. China

### S1. X-ray Crystallography

The single-crystal diffraction data for LCP **1** was collected by using a Bruker SMART APEXII CCD diffractometer at 293 K with Mo K $\alpha$  radiation ( $\lambda = 0.71073$  Å). The initial structure was solved by direct methods using the SHEL-XS program of the SHELX-TL package.<sup>1</sup> All crystal data and detailed structural refinement results are summarized in Table S1, and selected bond lengths (Å) and angles (°) are listed in Table S2. The crystallographic data for CP\_1 has been obtained as 2035795 from the Cambridge Crystallographic Data Center free of charge *via* <https://www.ccdc.cam.ac.uk>.

**Table S1.** Crystallographic data for LCP **1**.

| LCP                                           | <b>1</b>                                                         |
|-----------------------------------------------|------------------------------------------------------------------|
| Empirical formula                             | C <sub>32</sub> H <sub>29</sub> N <sub>4</sub> AgO <sub>12</sub> |
| Formula weight                                | 769.46                                                           |
| Crystal system                                | Triclinic                                                        |
| Space group                                   | <i>P</i> -1                                                      |
| <i>a</i> (Å)                                  | 8.492(6)                                                         |
| <i>b</i> (Å)                                  | 13.445(6)                                                        |
| <i>c</i> (Å)                                  | 13.518(6)                                                        |
| $\alpha$ (°)                                  | 83.690(9)                                                        |
| $\beta$ (°)                                   | 86.778(9)                                                        |
| $\gamma$ (°)                                  | 85.131(6)                                                        |
| <i>V</i> (Å <sup>3</sup> )                    | 1526.8(14)                                                       |
| <i>Z</i>                                      | 2                                                                |
| <i>D</i> <sub>calc</sub> (g/cm <sup>3</sup> ) | 1.674                                                            |
| $\mu$ /mm <sup>-1</sup>                       | 0.735                                                            |
| <i>F</i> (000)                                | 784                                                              |
| <i>R</i> <sub>int</sub>                       | 0.0529                                                           |

|                                                            |                  |
|------------------------------------------------------------|------------------|
| $R_1^a [I > 2\sigma(I)]$                                   | 0.0842           |
| $wR_2^b(\text{all data})$                                  | 0.2803           |
| GOF                                                        | 0.981            |
| $\Delta \rho_{\text{max}}(\text{e} \cdot \text{\AA}^{-3})$ | 1.841 and -0.851 |
| $R_1,^a wR_2^b [I > 2\sigma(I)]$                           | 0.0842, 0.2376   |
| $R_1,^a wR_2^b (\text{all data})$                          | 0.1548, 0.2803   |

$${}^aR_1 = \sum |F_o| - |F_c| / \sum |F_o|, {}^b wR_2 = [\sum w(F_o^2 - F_c^2)^2 / \sum w(F_o^2)^2]^{1/2}.$$

**Table S2.** Selected bond lengths (Å) and bond angles (°) for LCP **1**.

| LCP <b>1</b>                   |          |                   |          |
|--------------------------------|----------|-------------------|----------|
| Ag(1)–N(1)                     | 2.123(8) | Ag(1)–O(1)        | 2.721(7) |
| Ag(1)–N(2) #1                  | 2.155(8) | N(2)#1–Ag(1)–O(1) | 90.6(3)  |
| N(1)–Ag(1)–N(2)#1              | 168.1(3) | N(1)–Ag(1)–O(1)   | 96.7(3)  |
| Symmetry codes: #1 x+1, y, z-1 |          |                   |          |

**Table S3.** Hydrogen-bonding geometry (Å, °) for LCP **1**.

| D–H···A          | D–H  | H···A | D···A     | D–H···A |
|------------------|------|-------|-----------|---------|
| O(8)–H(8)···O(3) | 0.82 | 1.80  | 2.492(12) | 142     |
| O(5)–H(5)···O(2) | 0.82 | 2.31  | 3.023(11) | 145     |

**Table S4.** Comparison of fluorescent property of LCP **1** for sensing Hacac.

| Fluorescent sensing materials                                                                   | $K_{sv}$ (M <sup>-1</sup> ) | Detection Limit (M)    | Medium           | Ref.      |
|-------------------------------------------------------------------------------------------------|-----------------------------|------------------------|------------------|-----------|
| LCP <b>1</b>                                                                                    | $1.542 \times 10^4$         | $1.517 \times 10^{-5}$ | EtOH             | This work |
| $[\text{Zn}_4(3\text{-dpyb})_2(\text{odpa})_2(\text{H}_2\text{O})_3] \cdot 4\text{H}_2\text{O}$ | $2.1721 \times 10^5$        | $5.244 \times 10^{-6}$ | EtOH             | 2         |
| $[\text{Zn}_4(3\text{-dpyb})_2(\text{odpa})_2(\text{H}_2\text{O})_3] \cdot 4\text{H}_2\text{O}$ | $2.872 \times 10^4$         | $3.956 \times 10^{-5}$ | H <sub>2</sub> O | 2         |
| Co-CP                                                                                           | $1.04 \times 10^4$          | $2.3 \times 10^{-3}$   | EtOH             | 3         |
| Co-CP                                                                                           | $2.86 \times 10^3$          | $6.9 \times 10^{-3}$   | H <sub>2</sub> O | 3         |
| $\{[\text{Zn}(\text{XL})_2](\text{ClO}_4)_2 \cdot 6 \text{H}_2\text{O}\}_n$                     | $2.3 \times 10^3$           | $5.0 \times 10^{-6}$   | DMF              | 4         |
| $\{[\text{Zn}_3(\text{BBIB})_2(\text{NDC})_3] \cdot 2\text{DMF} \cdot 2\text{H}_2\text{O}\}_n$  |                             | $1.00 \times 10^{-7}$  | DMF              | 5         |

**Table S5.** Comparison of fluorescent property of LCP **1** for sensing NB.

| Fluorescent sensing materials                                                                         | $K_{sv}$ (M <sup>-1</sup> ) | Detection Limit (M)    | Medium | Ref.      |
|-------------------------------------------------------------------------------------------------------|-----------------------------|------------------------|--------|-----------|
| LCP <b>1</b>                                                                                          | $1.683 \times 10^4$         | $1.391 \times 10^{-5}$ | EtOH   | This work |
| $[\text{Zn}_4(3\text{-dpyb})_2(\text{odpa})_2(\text{H}_2\text{O})_3] \cdot 4\text{H}_2\text{O}$       | $1.037 \times 10^5$         | $1.098 \times 10^{-5}$ | EtOH   | 2         |
| $\{[\text{Zn}(\text{dip})(\text{hdin})] \cdot 2.5\text{H}_2\text{O}\}_n$                              | $1.0 \times 10^6$           | -                      | EtOH   | 6         |
| $\{[\text{Zn}(\text{dip})(\text{pedin})] \cdot 2.5\text{H}_2\text{O}\}_n$                             | $2.0 \times 10^6$           | -                      | EtOH   | 6         |
| $[\text{Cd}(\text{TPA})(\text{DIB})]_n$                                                               | $1.7 \times 10^4$           | $2.7 \times 10^{-7}$   | DMA    | 7         |
| $\{[\text{Zn}(\text{H}_4\text{L})(\text{bpy})0.5(\text{H}_2\text{O})_2] \cdot \text{H}_2\text{O}\}_n$ | $8.8 \times 10^3$           | -                      | DMA    | 8         |
| $\{[\text{Zn}_6(\text{L})_2(\text{H}_2\text{O})_7] \cdot (\text{DMF})_2\}_n$                          | $7.88 \times 10^3$          | -                      | DMA    | 8         |

**Table S6.** Comparison of fluorescent property of LCP **1** for sensing 2,6-DCN.

| Fluorescent sensing materials | $K_{sv}$ (M <sup>-1</sup> ) | Detection Limit (M) | Medium | Ref. |
|-------------------------------|-----------------------------|---------------------|--------|------|
|-------------------------------|-----------------------------|---------------------|--------|------|

|                                                                                               |                     |                        |      |           |
|-----------------------------------------------------------------------------------------------|---------------------|------------------------|------|-----------|
| LCP 1                                                                                         | $2.028 \times 10^5$ | $1.154 \times 10^{-6}$ | EtOH | This work |
| [Zn(L)(1,4-BDC)]·H <sub>2</sub> O                                                             | $2.78 \times 10^4$  | $1.19 \times 10^{-4}$  | DMF  | 9         |
| [Zn(L)(1,3-BDC)]·H <sub>2</sub> O                                                             | $4.88 \times 10^4$  | $8.05 \times 10^{-5}$  | DMF  | 9         |
| [Zn(L)(1,2-BDC)]                                                                              | $4.1 \times 10^4$   | $1.154 \times 10^{-6}$ | DMF  | 9         |
| [Cd(L) <sub>0.5</sub> (1,2-BDC)(H <sub>2</sub> O)]                                            | $3.34 \times 10^4$  | $8.1 \times 10^{-5}$   | DMF  | 9         |
| [Ag(CIP <sup>-</sup> )]                                                                       | $5.2 \times 10^4$   | $1.05 \times 10^{-4}$  | DMF  | 10        |
| [Mg <sub>2</sub> (APDA) <sub>2</sub> (H <sub>2</sub> O) <sub>3</sub> ]·5DMA·5H <sub>2</sub> O | $7.5 \times 10^4$   | $1.50 \times 10^{-4}$  | DMF  | 11        |
| [Zn <sub>2</sub> (L) <sub>2</sub> (TPA)]2H <sub>2</sub> O                                     | $2.36 \times 10^4$  | $3.9 \times 10^{-6}$   | MeOH | 12        |

**Table S7.** Comparison of fluorescent property of LCP 1 for sensing Fe<sup>2+</sup>.

| Fluorescent sensing materials                  | $K_{sv}$ (M <sup>-1</sup> ) | Detection Limit (M)    | Medium             | Ref.      |
|------------------------------------------------|-----------------------------|------------------------|--------------------|-----------|
| LCP 1                                          | $6.107 \times 10^4$         | $3.831 \times 10^{-6}$ | H <sub>2</sub> O   | This work |
| (E)-2-((pyren-1-ylmethylene)amino)benzenethiol | $3.04 \times 10^9$          | 0.3 ppm                | CH <sub>3</sub> CN | 13        |
| 8-hydroxyquinoline-based chemosensor           | -                           | $5.6 \times 10^{-7}$   | EtOH/THF           | 14        |
| HBTC                                           | -                           | $2.03 \times 10^{-6}$  | THF                | 15        |

**Table S8.** Comparison of fluorescent property of LCP 1 for sensing Hg<sup>2+</sup>.

| Fluorescent sensing materials                    | $K_{sv}$ (M <sup>-1</sup> ) | Detection Limit (M)    | Medium                | Ref.      |
|--------------------------------------------------|-----------------------------|------------------------|-----------------------|-----------|
| LCP 1                                            | $1.005 \times 10^5$         | $2.328 \times 10^{-6}$ | H <sub>2</sub> O      | This work |
| {[Zn(dip)(edin)]·3H <sub>2</sub> O} <sub>n</sub> | $1.0 \times 10^6$           | $3.15 \times 10^{-6}$  | H <sub>2</sub> O      | 6         |
| NO <sub>2</sub> /Dan <sub>4</sub>                | -                           | $1.0 \times 10^{-4}$   | MeCN                  | 16        |
| [Zn(OBA)(DPT) <sub>0.5</sub> ]·DMF (TMU-34(-2H)) | -                           | $6.9 \times 10^{-6}$   | acetonitrile          | 17        |
| Thiocoumarin derivatives                         | -                           | $1.7 \times 10^{-6}$   | H <sub>2</sub> O/MeCN | 18        |
| 2,3-diphenylpyrido[2,3-b]pyrazine                | -                           | $1.06 \times 10^{-6}$  | H <sub>2</sub> O      | 19        |
| 2-SBA-15                                         | -                           | $3.36 \times 10^{-7}$  | H <sub>2</sub> O      | 20        |

**Table S9.** Comparison of fluorescent property of LCP 1 for sensing Fe<sup>3+</sup>.

| Fluorescent sensing materials                                                                                  | $K_{sv}$ (M <sup>-1</sup> ) | Detection Limit (M)    | Medium           | Ref.      |
|----------------------------------------------------------------------------------------------------------------|-----------------------------|------------------------|------------------|-----------|
| LCP 1                                                                                                          | $1.186 \times 10^5$         | $1.973 \times 10^{-6}$ | H <sub>2</sub> O | this work |
| [Zn <sub>4</sub> (3-dpyb) <sub>2</sub> (odpa) <sub>2</sub> (H <sub>2</sub> O) <sub>3</sub> ]·4H <sub>2</sub> O | $9.129 \times 10^5$         | $1.247 \times 10^{-7}$ | H <sub>2</sub> O | 2         |
| [Zn(L)(1,4-BDC)]·H <sub>2</sub> O                                                                              | $5.8 \times 10^4$           | $5.7 \times 10^{-5}$   | H <sub>2</sub> O | 8         |
| [Zn(L)(1,3-BDC)]·H <sub>2</sub> O                                                                              | $3.74 \times 10^4$          | $8.82 \times 10^{-5}$  | H <sub>2</sub> O | 8         |
| [Zn(L)(1,2-BDC)]                                                                                               | $4.36 \times 10^4$          | $7.57 \times 10^{-5}$  | H <sub>2</sub> O | 8         |
| {[Eu <sub>2</sub> (ppda) <sub>2</sub> (npdc)(H <sub>2</sub> O)]·H <sub>2</sub> O} <sub>n</sub>                 | $1.64 \times 10^5$          | $1.66 \times 10^{-5}$  | H <sub>2</sub> O | 21        |
| {[Zn <sub>2</sub> (L) <sub>2</sub> (TPA)]·2H <sub>2</sub> O} <sub>n</sub>                                      | $6.4 \times 10^3$           | $3.84 \times 10^{-6}$  | EtOH             | 22        |
| {Cd(MDIP)(H <sub>2</sub> O) <sub>2</sub> } <sub>n</sub>                                                        | $4.13 \times 10^4$          | $8.0 \times 10^{-9}$   | H <sub>2</sub> O | 23        |
| EuL <sub>3</sub>                                                                                               | $4.1 \times 10^3$           | -                      | H <sub>2</sub> O | 24        |
| BUT-14                                                                                                         | $2.17 \times 10^3$          | -                      | H <sub>2</sub> O | 25        |

**Table S10.** Determination of Fe<sup>2+</sup>, Hg<sup>2+</sup> and Fe<sup>3+</sup> in river water samples.

| Metal ions       | Spiked ( $\mu\text{M}$ ) | Found ( $\mu\text{M}$ ) | Recovery (%) |
|------------------|--------------------------|-------------------------|--------------|
| $\text{Fe}^{2+}$ | 5                        | 5.01                    | 100.20       |
|                  | 10                       | 9.62                    | 96.20        |
|                  | 15                       | 14.96                   | 99.73        |
| $\text{Hg}^{2+}$ | 5                        | 5.11                    | 102.20       |
|                  | 10                       | 10.12                   | 101.2        |
|                  | 15                       | 14.96                   | 99.73        |
| $\text{Fe}^{3+}$ | 5                        | 5.03                    | 100.06       |
|                  | 10                       | 10.15                   | 101.50       |
|                  | 15                       | 15.65                   | 104.33       |

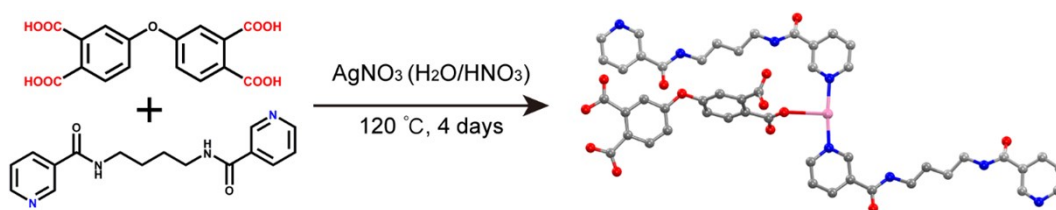

**Scheme S1.** Synthesis method of LCP 1.

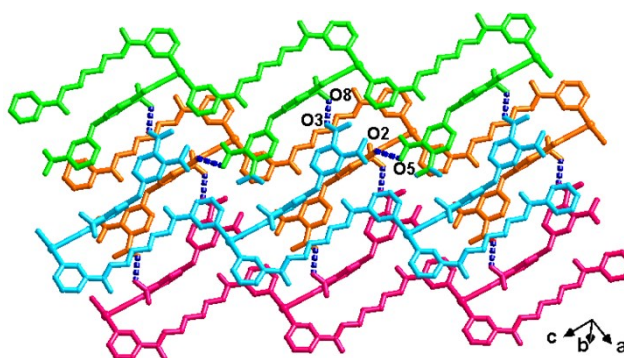

**Fig. S1.** View of 3D supramolecular architecture of LCP 1.

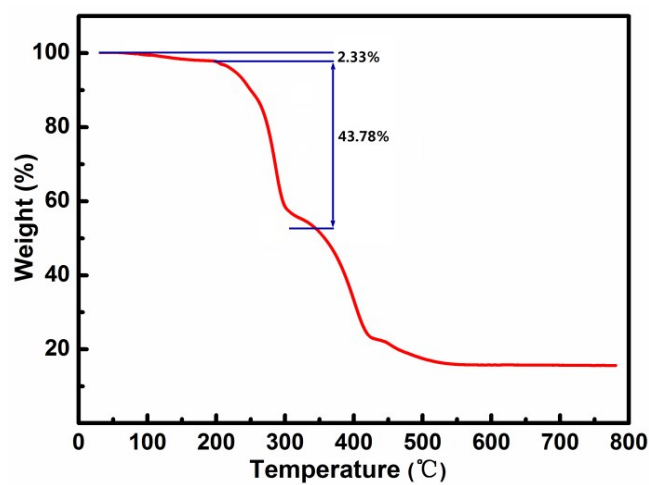

**Fig. S2.** The TGA curve of LCP 1.

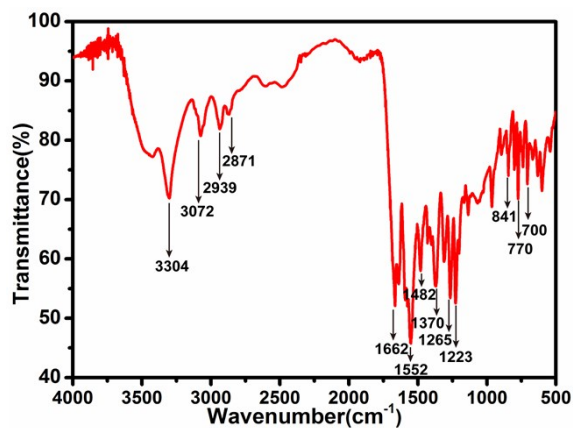

Fig. S3. The IR spectra of LCP 1.

Table S11. Various IR bands for functional groups of LCP 1.

| Wavenumber (cm <sup>-1</sup> ) | Functional group     |
|--------------------------------|----------------------|
| 3304                           | -OH                  |
| 3072, 2939, and 2871           | -CH <sub>2</sub> -   |
| 1662                           | -COOH                |
| 1552 1482, and 1370            | -COO-                |
| 1265 and 1223                  | -C-N-                |
| 841, 770, and 700              | N-heterocyclic rings |

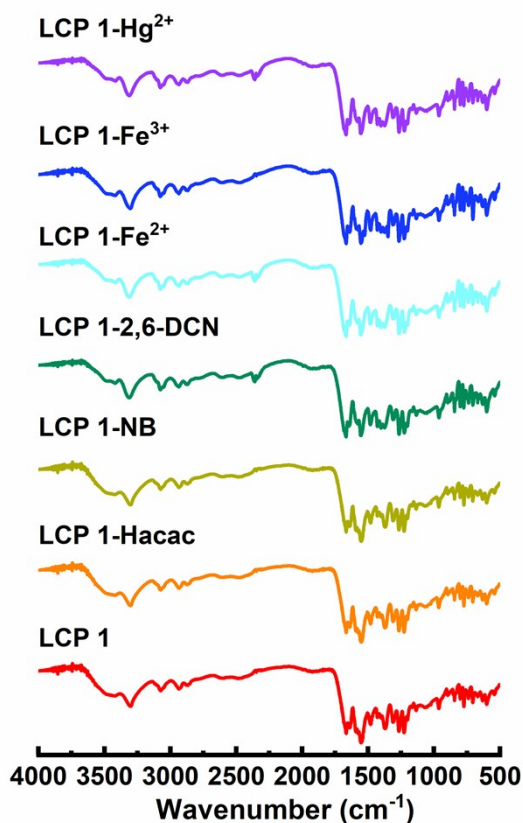

Fig. S4. The IR spectra of LCP 1 before and after being soaked in different analytes.

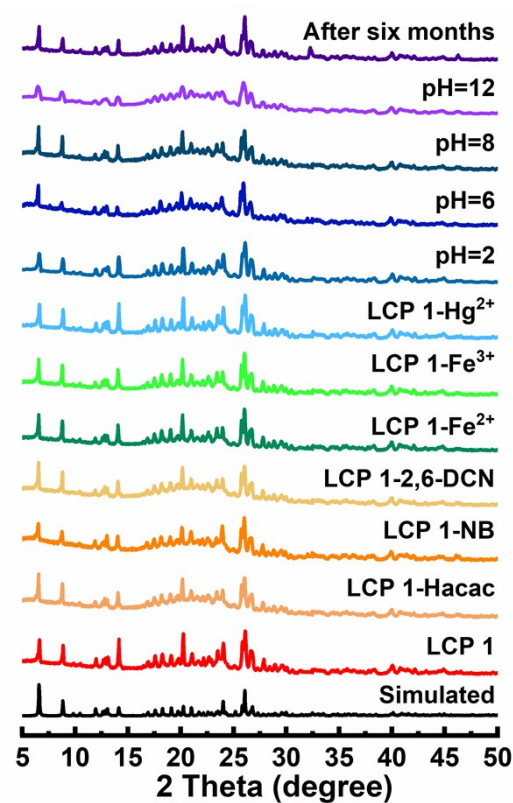

**Fig. S5.** The PXRD pattern of LCP 1 (black: simulated from the X-ray single-crystal data, red: synthesized) before and after exposure to different analytes, after being soaked in water, acidic, and basic solutions for 24 h using a wide pH range of 2.0 ~ 12.0, and placed in air for about 6 months.

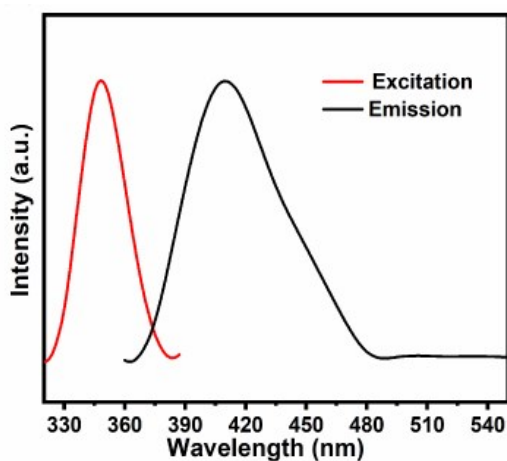

**Fig. S6.** The solid excitation and emission spectra of LCP 1.

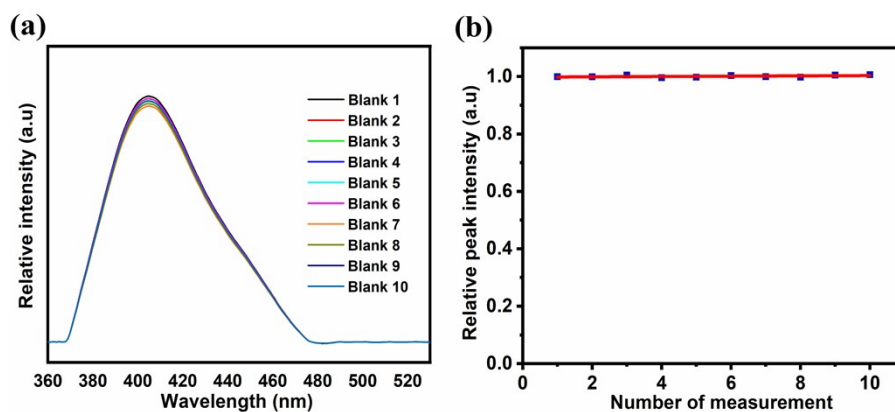

**Fig. S7.** (a) The photoluminescence spectra from ten cycles blank measurements for solid state of LCP **1**; (b) Calibration curve with blank measurements after ten cycles (insert: the standard deviation formula, where  $x$ ,  $\bar{x}$  and  $n$  represent the luminescence intensity values of LCP **1** after normalization, the average of the maximum luminescence intensity values of LCP **1** after ten cycles and the cycles of blank measurements, respectively). Calculated standard deviation,  $\delta = 0.07856$ .

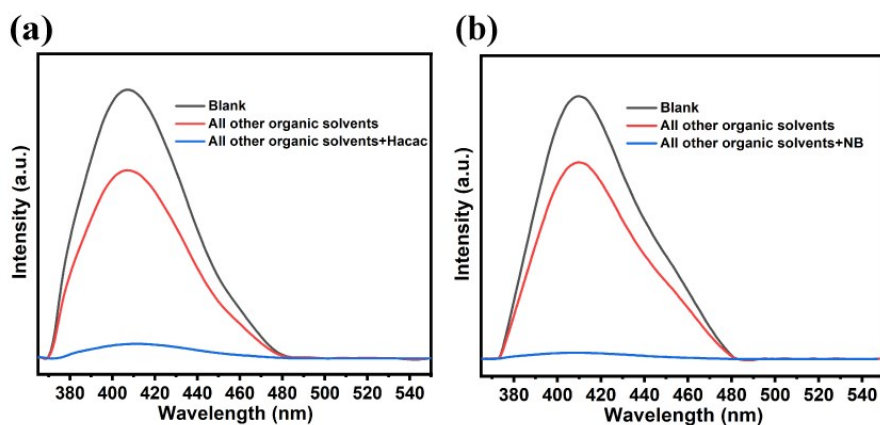

**Fig. S8.** The effect of adding other organic solvents on the luminescence intensity of (a) Hacac and (b) NB.

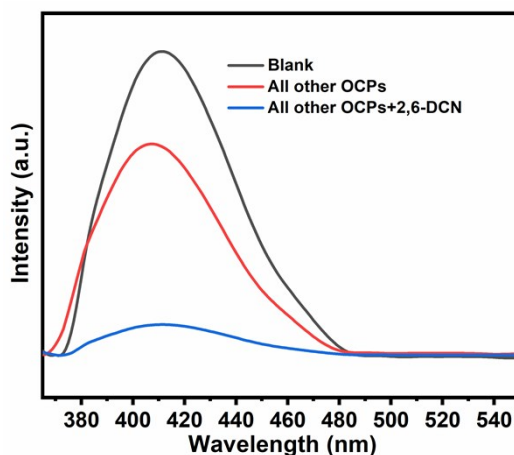

**Fig. S9.** The effect of adding other OCPs on the luminescence intensity of 2,6-DCN.

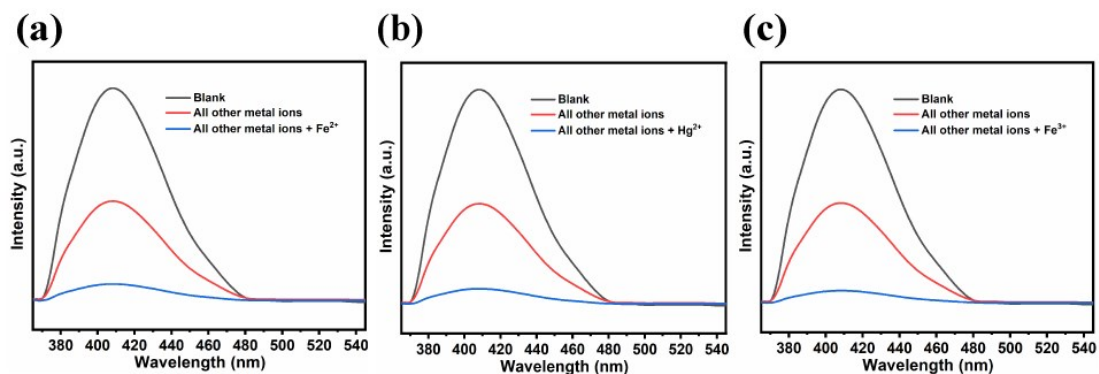

**Fig. S10.** The effect of adding other metal ions on the luminescence intensity of (a)  $\text{Fe}^{2+}$ , (b)  $\text{Hg}^{2+}$  and (c)  $\text{Fe}^{3+}$ .

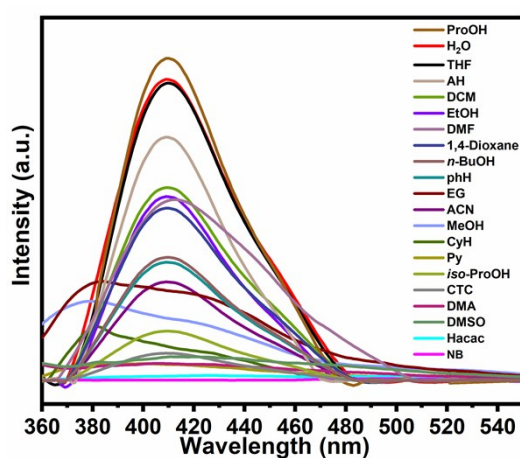

**Fig. S11.** Luminescence intensity of LCP 1 in different organic solvents.

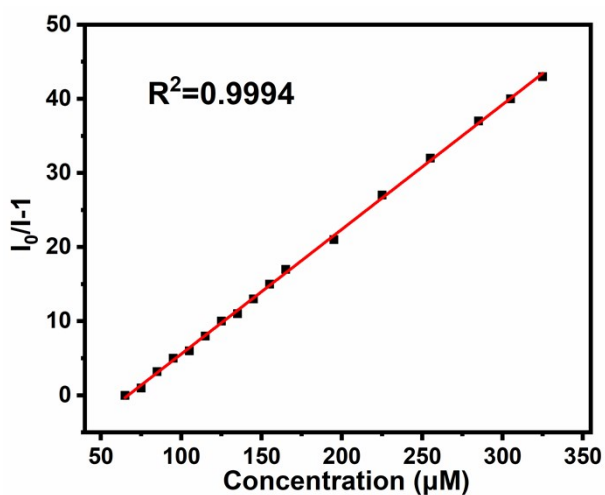

**Fig. S12.** The Stern-Volmer plot of  $I_0/I-1$  vs. the concentration of 2,6-DCN.



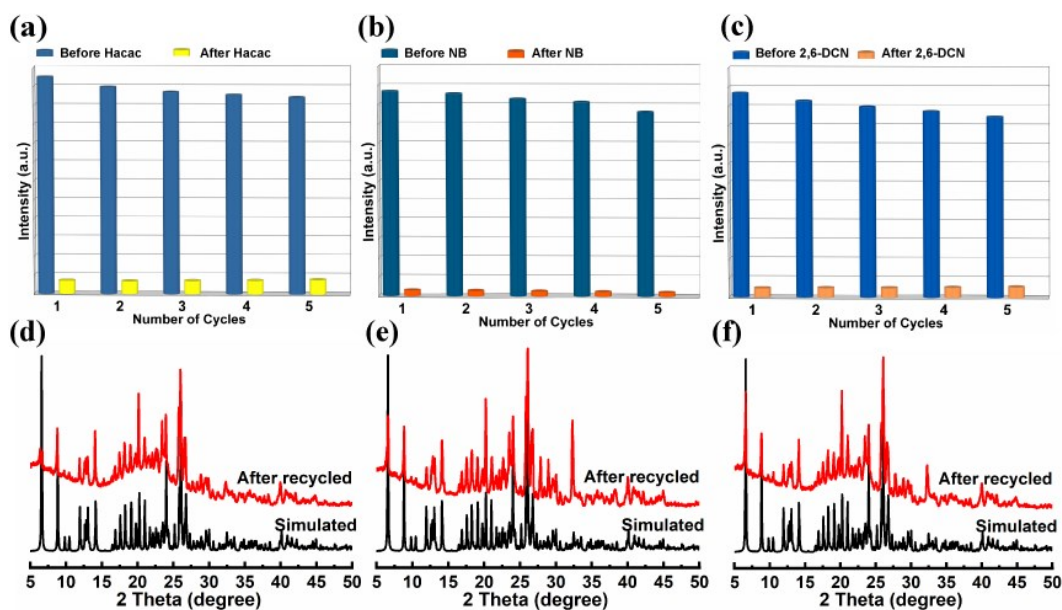

**Fig. S13.** The cyclic response of the luminescence intensities of LCP **1** for detecting Hacac (a), NB (b) and 2,6-DCN (c); The PXRD patterns of LCP **1** treated by the Hacac (d), NB (e) and 2,6-DCN (f).

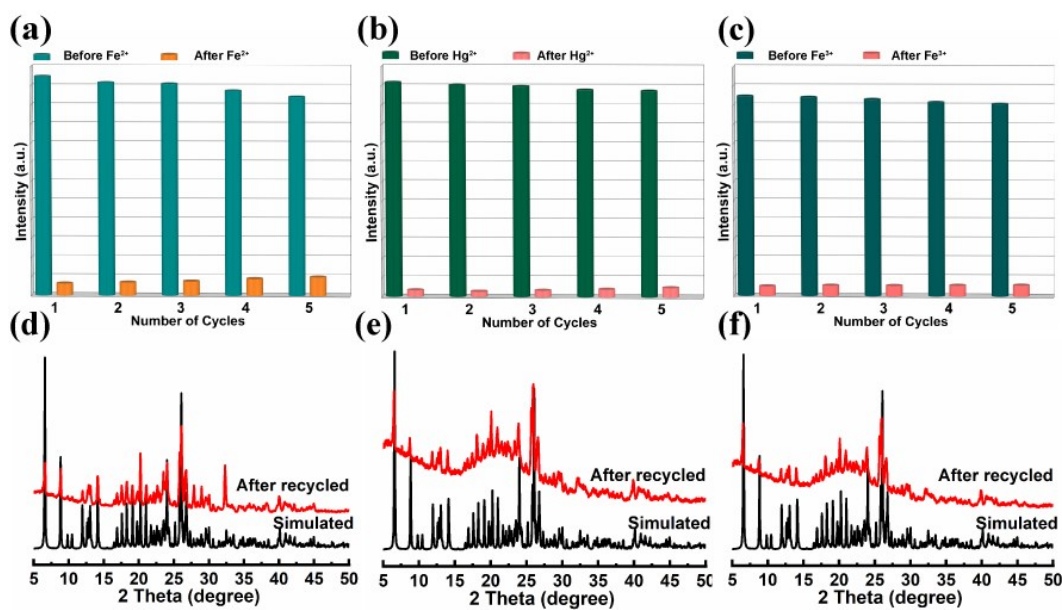

**Fig. S14.** The cyclic response of the luminescence intensities of LCP **1** for detecting of Fe<sup>2+</sup> (a), Hg<sup>2+</sup> (b) and Fe<sup>3+</sup> (c); The PXRD patterns of LCP **1** treated by the of Fe<sup>2+</sup> (d), Hg<sup>2+</sup> (e) and Fe<sup>3+</sup> (f).

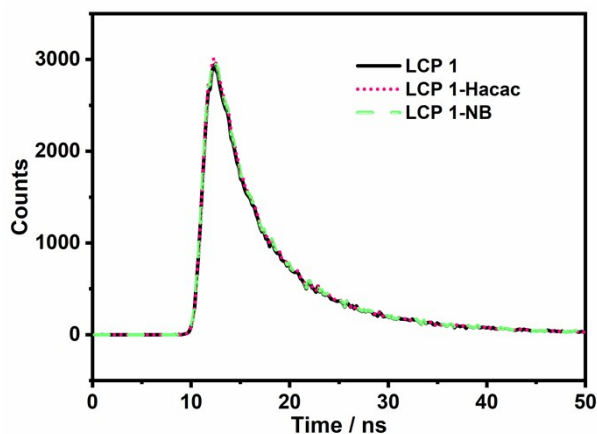

Fig. S15. Lifetime decay curves of LCP 1 before and after the addition of two analyses.

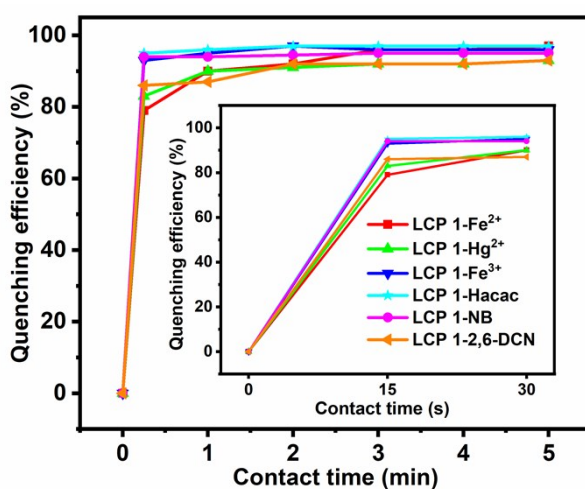

Fig. S16. Time-dependent fluorescence quenching percentage by six analyses from 0–5 minutes. (Inset: from 0–30 seconds).

## References

1. G. M. Sheldrick, *Acta Cryst*, 2008, **64**, 112-122.
2. J. X. Ma, N. Xu, Y. Liu, Y. Wang, H. Li, G.C. Liu, X.L. Wang, J. R. Li, *Inorg Chem*, 2020, **59**, 15495-15503.
3. Q. Q. Xiao, G. Y. Dong, Y. H. Li, *Inorg. Chem*, 2019, **58**, 15696-15699.
4. X. M. Kang, X. Y. Fan, P. Y. Hao, *Inorg Chem Front.*, 2019, **6**, 271-277.
5. S. L. Yao, S. J. Liu, X. M. Tian, T. F. Zheng, C. Cao, C. Y. Niu, Y. Q. Chen and H. R. Wen, *Inorg. Chem.*, 2019, **58**, 3578-3581.
6. B. L. Martinez, A. D. Shrode, R. J. Staples, R. L. LaDuca, *Polyhedron*, 2018, **151**, 369-380.
7. X. Wang, Y. Han, X. X. Han, *New J Chem*, 2018, **42**, 19844-19852.
8. X. D. Duan, F. Y. Ge, H. G. Zheng, *Inorg. Chem. Commun.*, 2019, **107**, 107479.
9. G. C. Liu, S. W. Han, Y. Gao, N. Xu, X. L. Wang, B. K. Chen. 10.1039/d0ce01351j
10. D. D. Feng, Y. D. Zhao, X. Q. Wang, D. D. Fang, J. Tang, L. M. Fan and J. Yang, *Dalton Trans.*, 2019, **48**, 10892-10900.

11. N. Xu, Q. H. Zhang, B. S. Hou, Q. Cheng and G. A. Zhang, *Inorg. Chem.*, 2018, **57**, 13330-13340.
12. H. He, S. H. Chen, D. Y. Zhang, R. Hao, C. Zhang, E. C. Yang and X. J. Zhao, *Dalton Trans.*, 2017, **46**, 13502-13509.
13. S. Pandey, A. Azam, S. Pandey and H. M. Chawla, *Org. Biomol. Chem.*, 2009, **7**, 269-279.
14. S. A. A. Razavi, M. Y. Masoomi, A. Morsali, *Inorg. Chem.*, 2017, **56**, 9646-9652.
15. M. G. Choi, Y. H. Kim, J. E. Namgoong and S. K. Chang, *Chem. Commun.*, 2009, **24**, 3560-3562.
16. K. Xu, Y. Li, Y. Si, Y. He, J. Ma, J. He, H. Hou and K. A. Li, *J. Lumin.*, 2018, **204**, 182-188.
17. R. M. Tivier, I. Leray, B. Lebeau, and B. Valeurab, *J. Mater. Chem.*, 2005, **15**, 2965-2973.
18. C. F. Wan, Y. J. Chang, C. Y. Chien, Y. W. Sie, C. H. Hu, A. T. Wu, *J. Lumin.*, 2016, **178**, 115-120.
19. N. Lashgari, A. Badiiei, G. Mohammadi Ziarani, *J. Fluoresc.*, 2016, **26**, 1885-1894.
20. S. Cetindere, S.O. Tümay, A, et al., *J. Fluoresc.*, 2016, **26**, 1173-1181.
21. Z. Zhan, X. Liang, X. Zhang, Y. Jia, M. Hu, *Dalton Trans.*, 2019, **48**, 1786-1794.
22. X. Y. Guo, Z. P. Dong, F. Zhao, Z. L. Liu, Y. Q. Wang, *New J. Chem.*, 2019, **43**, 2353-2361.
23. Y. Li, Z. Chang, F. Huang, P. Wu, H. Chu, J. Wang, *Dalton Trans.*, 2018, **47**, 9267-9273.
24. M. Zheng, H. Tan, Z. Xie, L. Zhang, X. Jing, Z. Sun, *ACS Appl. Mater. Interfaces.*, 2013, **5**, 1078-1083.
25. B. Wang, Q. Yang, C. Guo, Y. Sun, L. H. Xie, J. R. Li, *ACS Appl. Mater. Interfaces.*, 2017, **9**, 10286-10295.
